# Supplementary material
Source: PubMed Central journal article supplement (PMC6417497)
Supplement: NIHMS996378-supplement-Suppl_figures.pdf [file NIHMS996378-supplement-Suppl_figures.pdf]

BrCa Patient Age @ Diagnosis  
versus mtDNA amount in tumor. Patient N=539

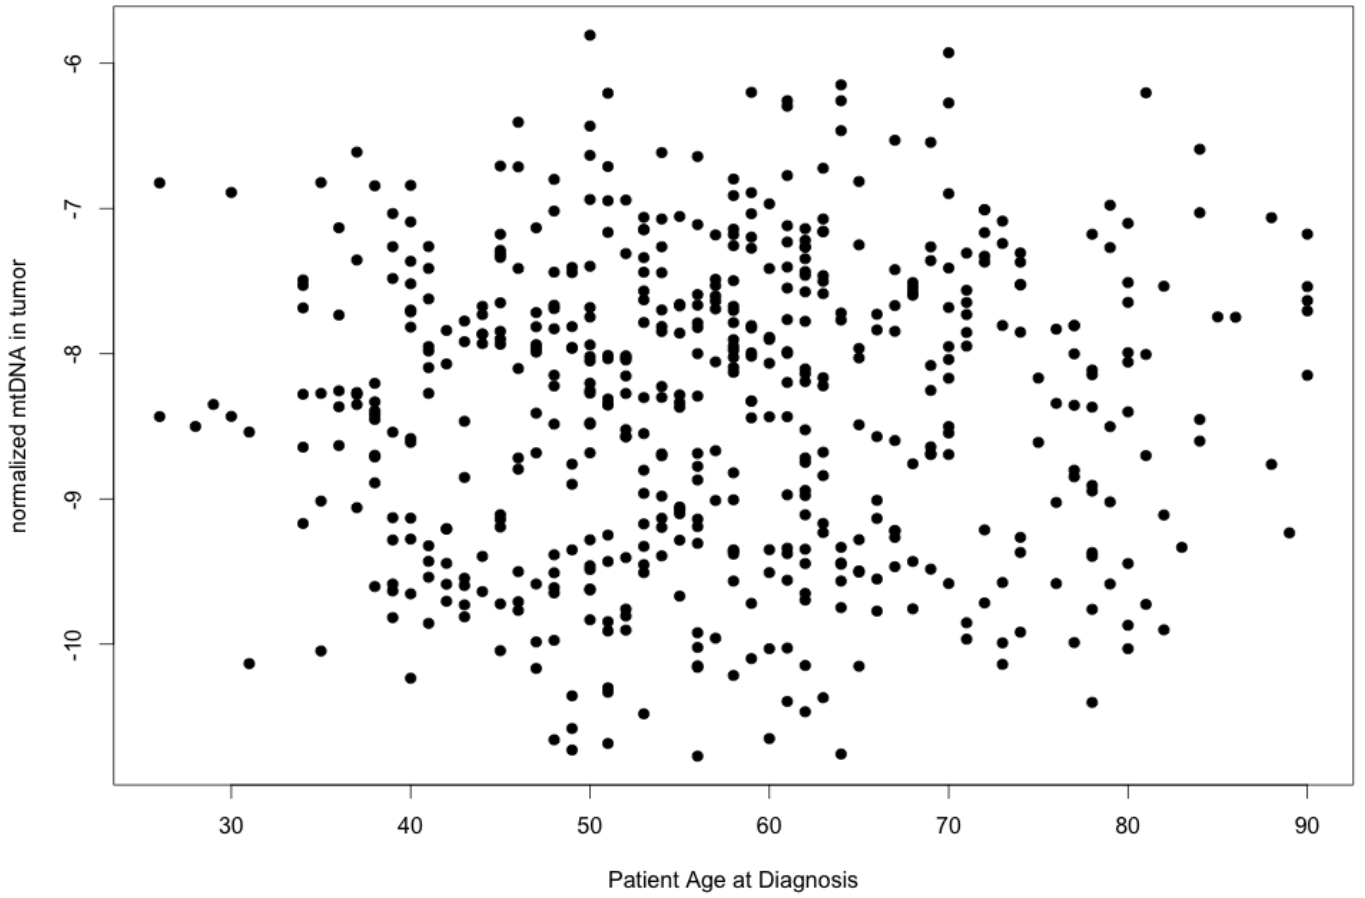

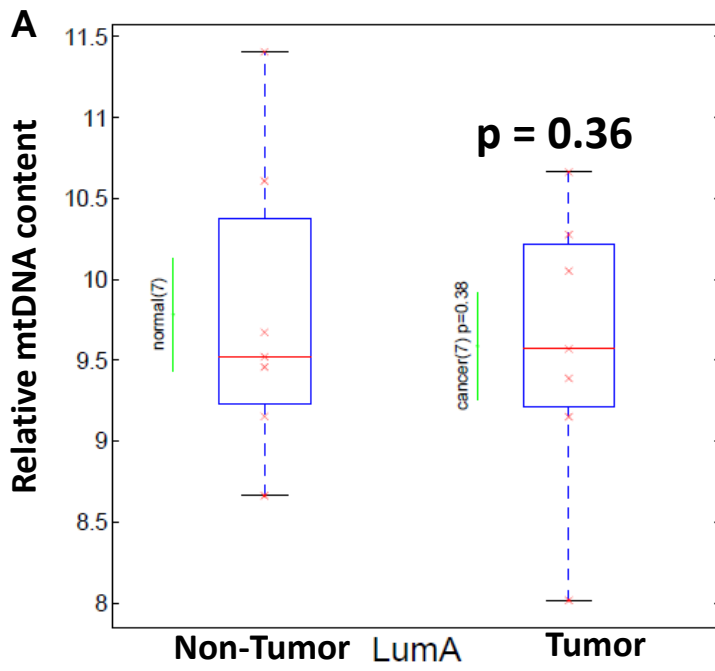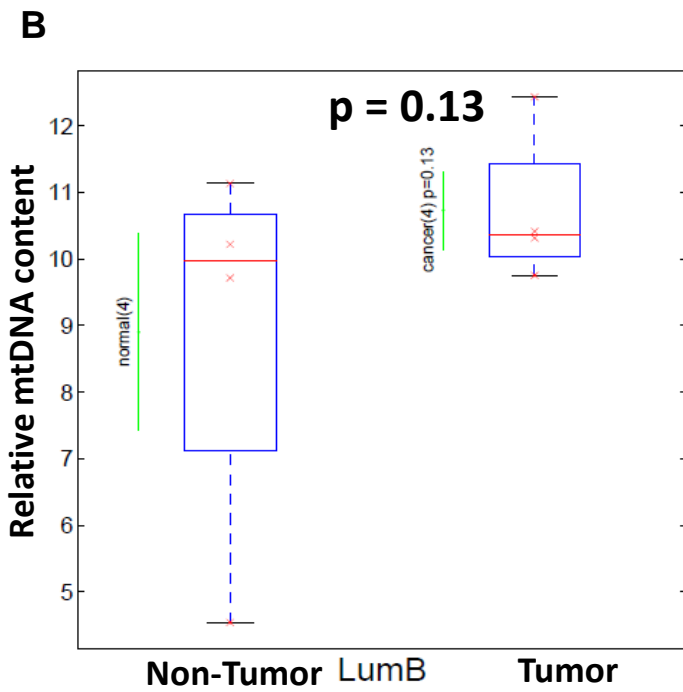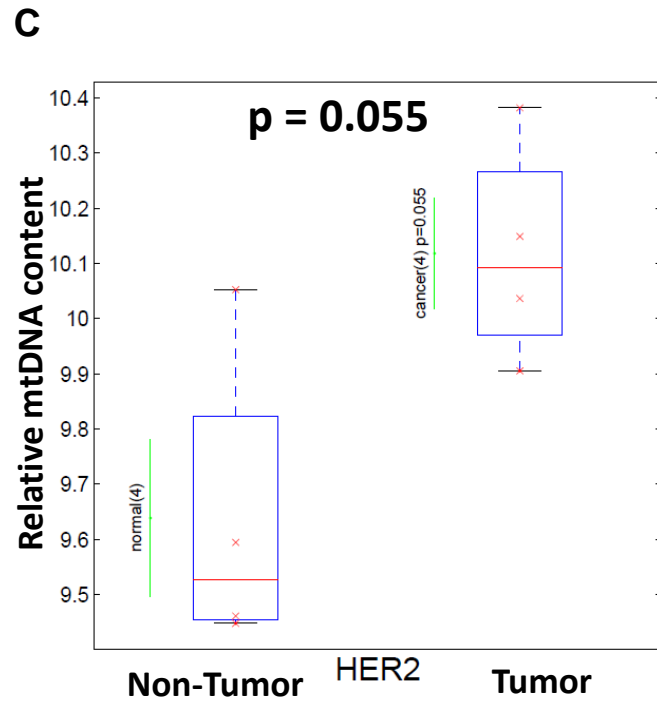

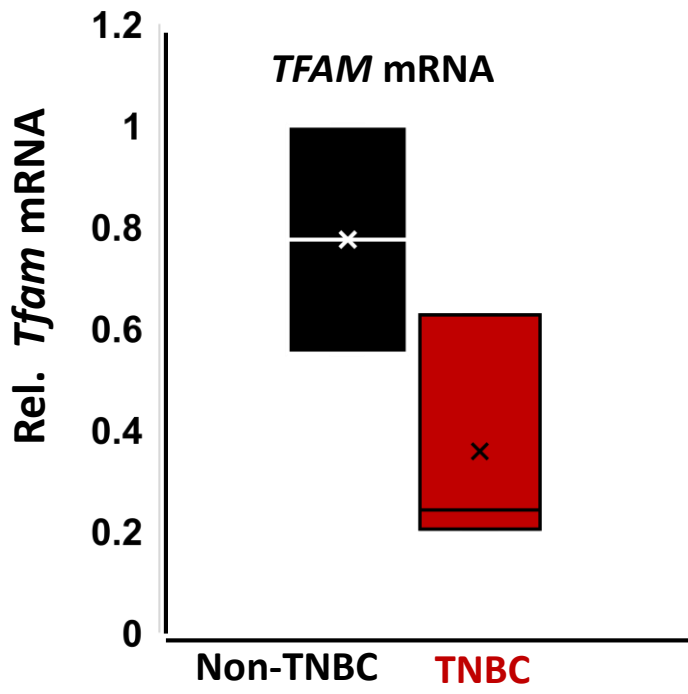

A

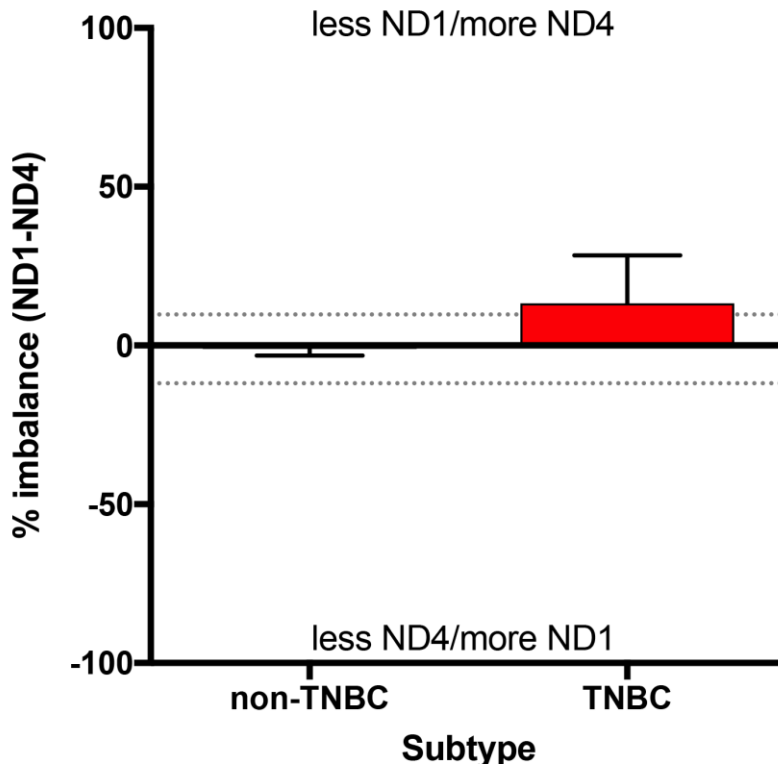

B

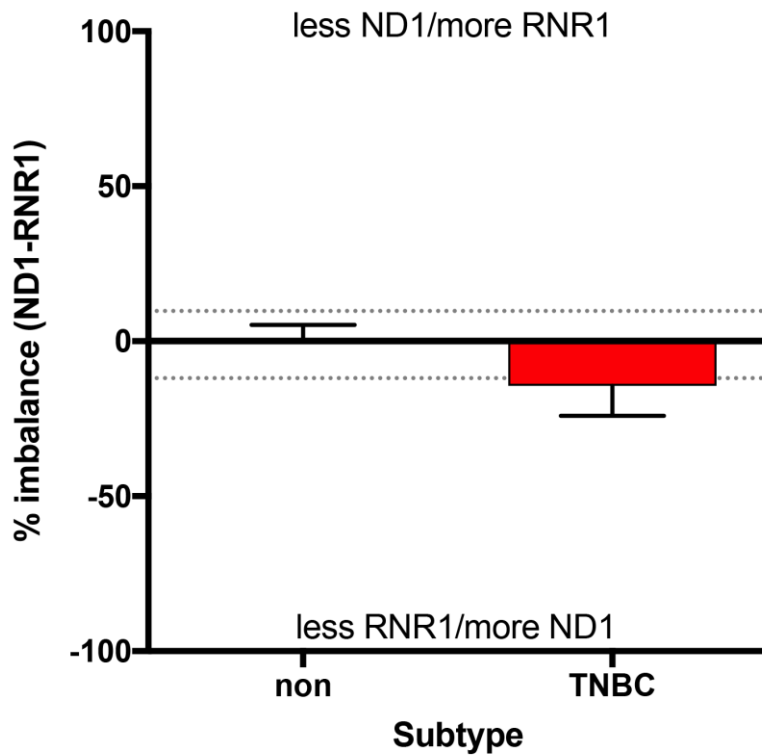

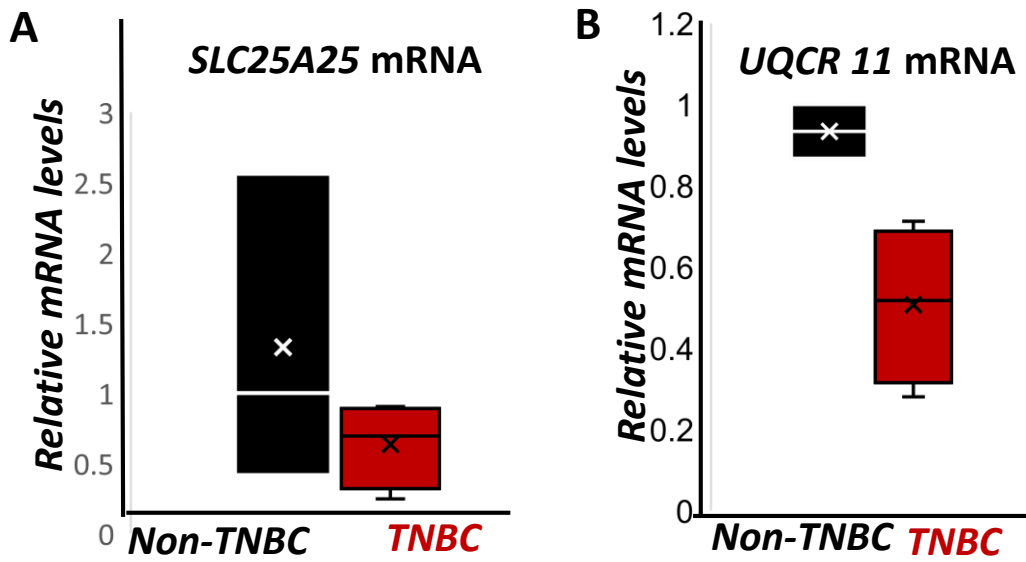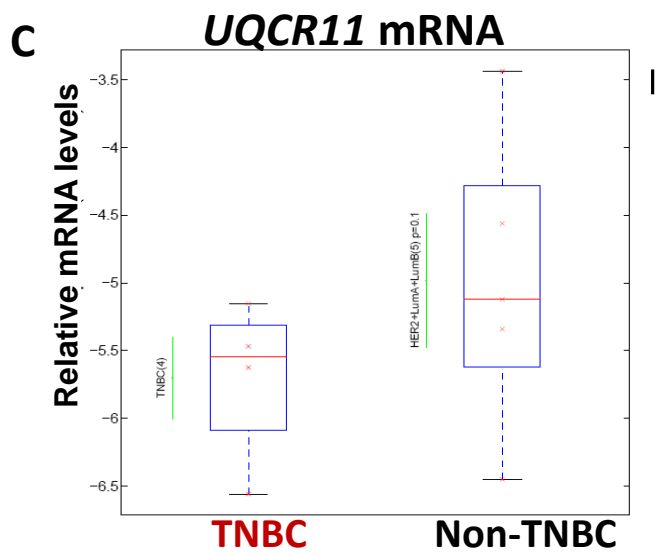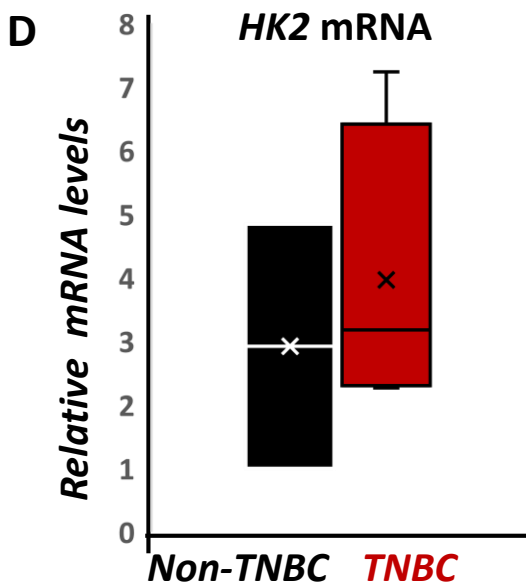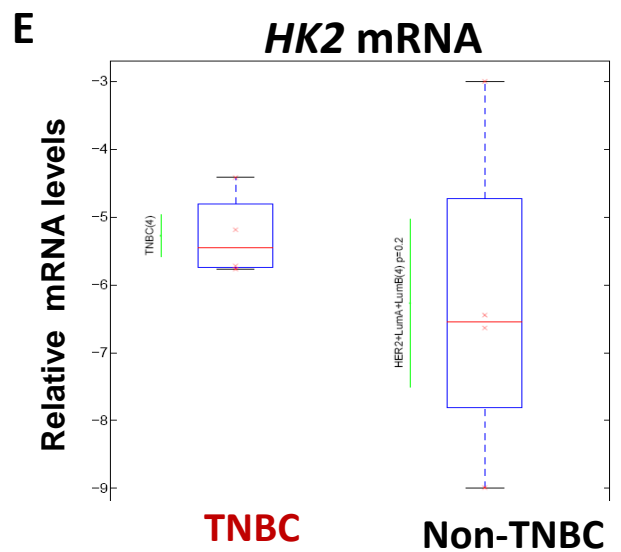

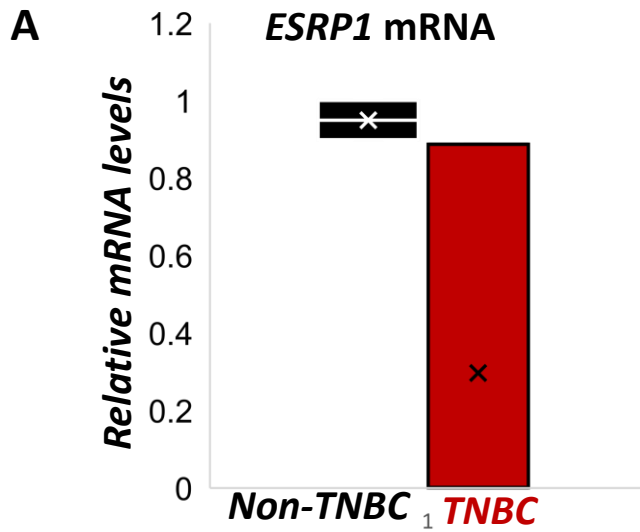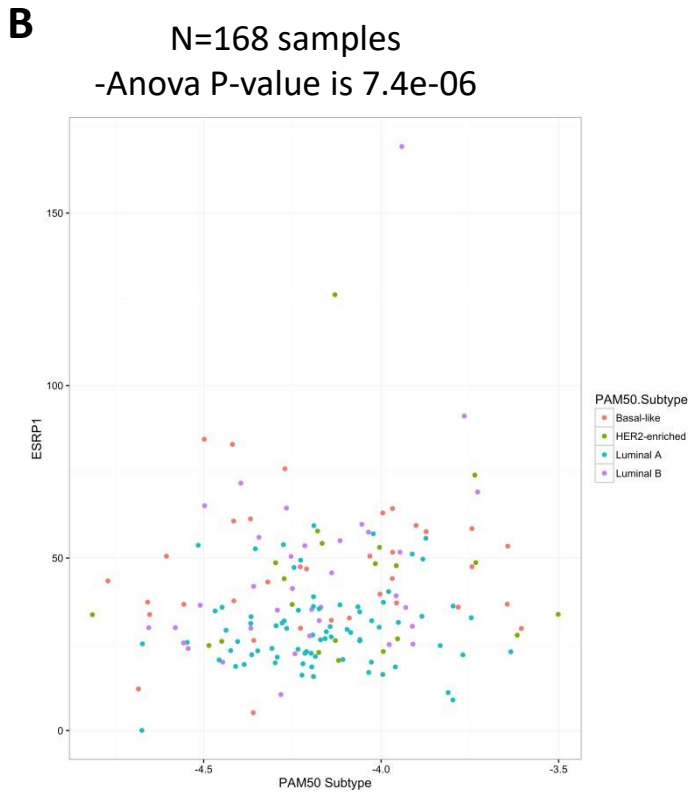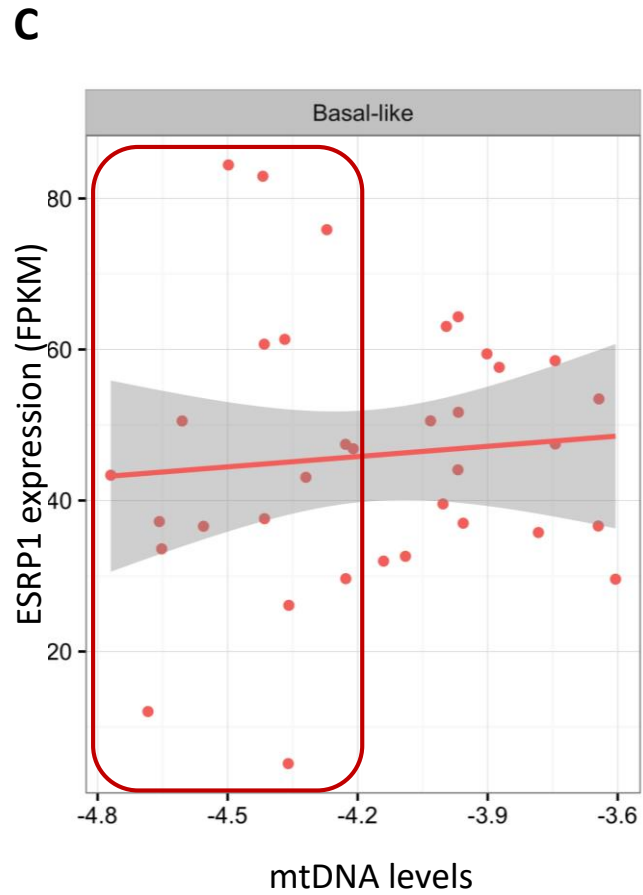

mtDNA vs BRCA1mut-sample #

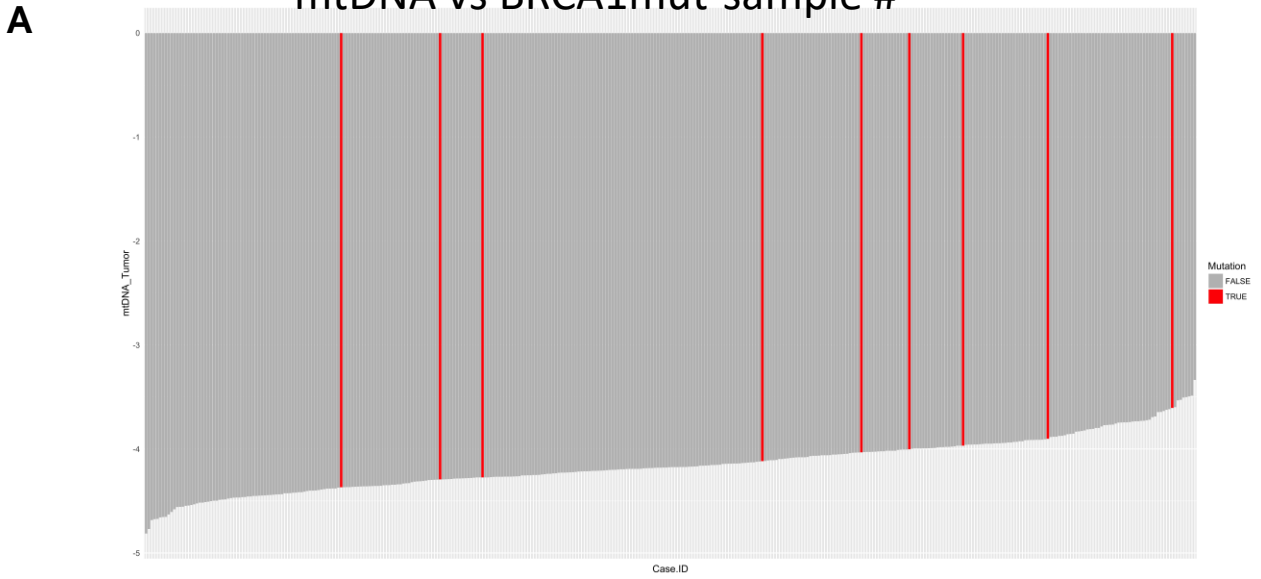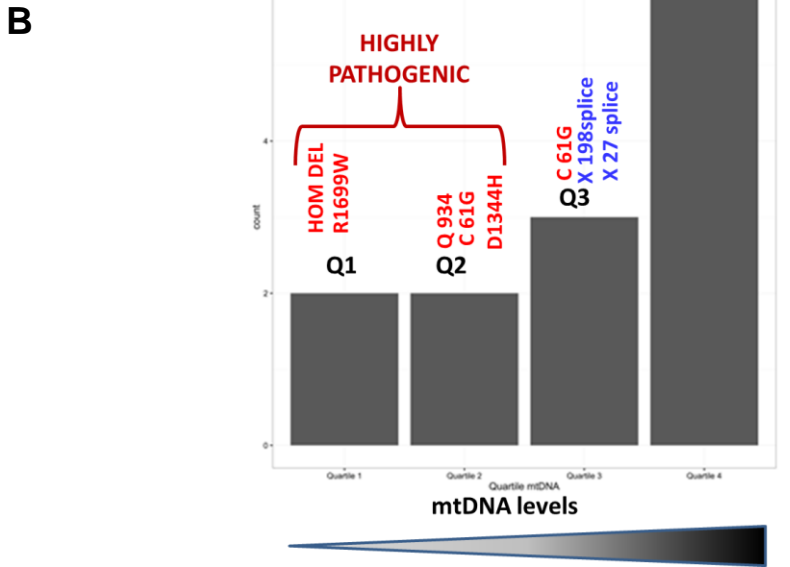

**C**

| "patient_id" | "study" | "mtDNA_Tumor"     | "mtDNA_Blood" | "Data_Type" | "Sequencing_Center" | "Case.ID"         | "Alteration"       | "Type"       | "mt_DNA_QRTILE" |
|--------------|---------|-------------------|---------------|-------------|---------------------|-------------------|--------------------|--------------|-----------------|
| "A1-A05H"    | "BRCA"  | -4.29265126323415 | -4.299744     | "WXS"       | "WUGSC"             | "TCGA-A1-A05H-01" | "MUT: Q934*,C61G"  | "Quartile 2" | "Quartile 2"    |
| "A1-A0S0"    | "BRCA"  | -4.03181759420862 | -4.011466     | "WXS"       | "WUGSC"             | "TCGA-A1-A0S0-01" | "MUT: X27_splice"  | "Quartile 3" | "Quartile 3"    |
| "A2-A04U"    | "BRCA"  | -3.78295925570477 | -4.32902      | "WXS"       | "WUGSC"             | "TCGA-A2-A04U-01" | "AMP;"             | "Quartile 4" | "Quartile 4"    |
| "AN-A0XU"    | "BRCA"  | -4.00318329343255 | -4.345947     | "WXS"       | "WUGSC"             | "TCGA-AN-A0XU-01" | "MUT: G1788V"      | "Quartile 3" | "Quartile 3"    |
| "BH-A0BL"    | "BRCA"  | -3.60496746883918 | -4.733256     | "WXS"       | "WUGSC"             | "TCGA-BH-A0BL-01" | "MUT: C61G"        | "Quartile 4" | "Quartile 4"    |
| "BH-A0DE"    | "BRCA"  | -3.81125285394462 | -4.387006     | "WXS"       | "WUGSC"             | "TCGA-BH-A0DE-01" | "AMP;"             | "Quartile 4" | "Quartile 4"    |
| "BH-A18G"    | "BRCA"  | -4.35877393826398 | -4.349146     | "WXS"       | "WUGSC"             | "TCGA-BH-A18G-01" | "HOMDEL;"          | "Quartile 1" | "Quartile 1"    |
| "C8-A12K"    | "BRCA"  | -4.368183636723   | -4.304181     | "WXS"       | "WUGSC"             | "TCGA-C8-A12K-01" | "MUT: R1699W"      | "Quartile 1" | "Quartile 1"    |
| "C8-A12T"    | "BRCA"  | -4.27313085894614 | -3.992242     | "WXS"       | "WUGSC"             | "TCGA-C8-A12T-01" | "MUT: D1344H"      | "Quartile 2" | "Quartile 2"    |
| "D8-A147"    | "BRCA"  | -3.96773296760087 | -4.069259     | "WXS"       | "WUGSC"             | "TCGA-D8-A147-01" | "MUT: C61G"        | "Quartile 4" | "Quartile 4"    |
| "E2-A14N"    | "BRCA"  | -3.90177207331874 | -4.34143      | "WXS"       | "WUGSC"             | "TCGA-E2-A14N-01" | "MUT: E111Gfs*3"   | "Quartile 4" | "Quartile 4"    |
| "E2-A14Z"    | "BRCA"  | -4.11620160638958 | -4.477992     | "WXS"       | "WUGSC"             | "TCGA-E2-A14Z-01" | "MUT: X198_splice" | "Quartile 3" | "Quartile 3"    |
| "EW-A1PD"    | "BRCA"  | -3.94950530570675 | -4.32672      | "WXS"       | "WUGSC"             | "TCGA-EW-A1PD-01" | "AMP;"             | "Quartile 4" | "Quartile 4"    |
